# Supplementary material for: Extreme Features of the Galdieria sulphuraria Organellar Genomes: A Consequence of Polyextremophily?
Source: PubMed Central journal article supplement — Genome Biol Evol. 2014 Dec 30;7(1):367–80. doi: 10.1093/gbe/evu290 (PMC4316638; doi:10.1093/gbe/evu290), 2014-12-30

Table S1 - Contigs &gt;200 bp and &gt;15x coverage from the SRR039878 MIRA assembly

| # name             | length | av.qual | #-reads | mx.cov. | av.cov | GC%   | blast (<10 <sup>-5</sup> ) |
|--------------------|--------|---------|---------|---------|--------|-------|----------------------------|
| Galdieria_rep_c807 | 21716  | 61      | 21276   | 172     | 85.98  | 43.94 | Mt (full)                  |
| Galdieria_rep_c808 | 13012  | 60      | 5631    | 82      | 39.74  | 33.4  | Cp                         |
| Galdieria_rep_c809 | 4830   | 59      | 1608    | 52      | 31.11  | 29.34 | Cp                         |
| Galdieria_rep_c812 | 8374   | 59      | 2709    | 54      | 31.08  | 24.6  | Cp                         |
| Galdieria_rep_c811 | 16987  | 59      | 5320    | 50      | 29.88  | 28.1  | Cp                         |
| Galdieria_rep_c813 | 7704   | 59      | 2447    | 60      | 29.84  | 26.36 | Cp                         |
| Galdieria_rep_c815 | 11901  | 59      | 3697    | 56      | 29.58  | 26.58 | Cp                         |
| Galdieria_rep_c819 | 17564  | 60      | 5566    | 53      | 29.53  | 28.06 | Cp                         |
| Galdieria_rep_c821 | 8023   | 60      | 2511    | 45      | 29.36  | 29.1  | Cp                         |
| Galdieria_rep_c831 | 6154   | 59      | 1949    | 47      | 29.22  | 27.48 | Cp                         |
| Galdieria_rep_c816 | 11927  | 59      | 3670    | 55      | 28.88  | 26.84 | Cp                         |
| Galdieria_rep_c814 | 9647   | 60      | 3082    | 50      | 28.71  | 29.97 | Cp                         |
| Galdieria_rep_c850 | 228    | 55      | 65      | 60      | 28.67  | 39.47 | Mt (repeat region)         |
| Galdieria_rep_c818 | 7767   | 59      | 2390    | 51      | 28.44  | 29.13 | Cp                         |
| Galdieria_rep_c828 | 7084   | 59      | 2130    | 43      | 28.31  | 26.89 | Cp                         |
| Galdieria_rep_c824 | 3770   | 59      | 1122    | 44      | 27.58  | 29.77 | Cp                         |
| Galdieria_rep_c822 | 4689   | 59      | 1365    | 45      | 27.57  | 25.02 | Cp                         |
| Galdieria_rep_c825 | 6138   | 59      | 1799    | 46      | 27.14  | 27.34 | Cp                         |
| Galdieria_rep_c829 | 2561   | 59      | 760     | 47      | 27.09  | 27.72 | Cp                         |
| Galdieria_rep_c820 | 421    | 52      | 114     | 54      | 26.99  | 24.29 | Nc (Gasu_62900)            |
| Galdieria_rep_c834 | 3273   | 59      | 953     | 41      | 26.8   | 28.02 | Cp                         |
| Galdieria_rep_c844 | 231    | 52      | 65      | 59      | 26.75  | 40.26 | Mt (repeat region)         |
| Galdieria_rep_c837 | 1066   | 58      | 294     | 41      | 26.41  | 24.77 | Cp                         |
| Galdieria_rep_c830 | 1694   | 57      | 472     | 46      | 26.41  | 24.79 | Cp                         |
| Galdieria_rep_c817 | 6517   | 59      | 1827    | 48      | 26.21  | 24.8  | Cp                         |
| Galdieria_rep_c833 | 588    | 58      | 170     | 40      | 25.97  | 26.7  | Cp                         |
| Galdieria_rep_c836 | 744    | 59      | 226     | 50      | 25.46  | 34.81 | Nc (Gasu_61090)            |
| Galdieria_rep_c823 | 1891   | 57      | 492     | 51      | 24.9   | 26.6  | Nc (Gasu_62020)            |
| Galdieria_rep_c826 | 1672   | 58      | 462     | 41      | 23.76  | 28.83 | Cp                         |
| Galdieria_rep_c810 | 2549   | 54      | 603     | 92      | 22.29  | 31.83 | Nc (Gasu_63970)            |
| Galdieria_c804     | 1925   | 58      | 475     | 60      | 21.51  | 35.45 | Nc (Gasu_34410)            |
| Galdieria_rep_c840 | 317    | 56      | 63      | 33      | 18.36  | 36.59 | Nc (Gasu_63580)            |
| Galdieria_rep_c862 | 668    | 55      | 126     | 46      | 17.94  | 33.88 | Nc (Gasu_63970)            |
| Galdieria_rep_c827 | 3208   | 58      | 626     | 58      | 16.87  | 35.66 | Nc (Gasu_64790)            |
| Galdieria_rep_c846 | 1129   | 56      | 209     | 36      | 16.23  | 35.43 | Nc (Gasu_62440)            |
| Galdieria_rep_c845 | 821    | 59      | 150     | 38      | 16.21  | 35.32 | No Match                   |
| Galdieria_c797     | 714    | 54      | 143     | 39      | 16.13  | 32.35 | Nc (Gasu_65690)            |
| Galdieria_rep_c848 | 2512   | 58      | 481     | 43      | 16.04  | 32.84 | No Match                   |
| Galdieria_rep_c861 | 373    | 56      | 66      | 30      | 15.96  | 21.98 | Cp                         |
| Galdieria_rep_c854 | 1175   | 56      | 203     | 35      | 15.4   | 37.11 | Nc (Gasu_42170)            |
| Galdieria_rep_c838 | 3205   | 58      | 557     | 49      | 15.23  | 34.1  | Nc (Gasu_61670)            |
| Galdieria_rep_c875 | 488    | 48      | 81      | 40      | 15.07  | 25.41 | Nc (Gasu_15650)            |
| Galdieria_c388     | 203    | 52      | 33      | 28      | 14.73  | 19.21 | Nc (Gasu_63970)            |
| Galdieria_rep_c835 | 1232   | 55      | 201     | 51      | 14.5   | 35.88 | Nc (Gasu_61740)            |

Table S2 - Change in amino acid usage among red algal mitochondrial genomes

|   | Cyanidiophyceae |      | Bangiophyceae |      |      |      | Florideophyceae |      |      |      |      | Median<br>AA Freq |
|---|-----------------|------|---------------|------|------|------|-----------------|------|------|------|------|-------------------|
|   | Cmer            | Gsul | Phai          | Ppur | Pumb | Pyez | Ccri            | Gand | Glem | Gory | Ppul |                   |
| A | -1.3            | -2.3 | 1.1           | 1.1  | 1.1  | 1.0  | -1.2            | 1.0  | -1.0 | -1.0 | -1.4 | 4.9               |
| C | -1.1            | 1.0  | -1.0          | 1.1  | 1.4  | -1.1 | 1.1             | -1.1 | -1.1 | -1.0 | 1.8  | 1.3               |
| D | 1.0             | -2.0 | 1.2           | 1.4  | 1.2  | 1.3  | -1.0            | -1.0 | -1.0 | -1.1 | -1.1 | 2.3               |
| E | -1.0            | 3.2  | 1.2           | 1.3  | 1.0  | 1.2  | -1.1            | -1.0 | -1.0 | -1.0 | -1.2 | 2.8               |
| F | 1.0             | -3.9 | -1.2          | -1.3 | -1.1 | -1.3 | 1.0             | 1.1  | 1.0  | -1.0 | 1.1  | 9.2               |
| G | -1.2            | 2.1  | 1.0           | -1.0 | 1.0  | 1.0  | -1.1            | -1.0 | -1.0 | 1.0  | -1.1 | 5.6               |
| H | 1.0             | -1.4 | 1.0           | 1.0  | -1.0 | 1.1  | -1.1            | -1.0 | -1.0 | 1.0  | -1.0 | 2.0               |
| I | 1.2             | -1.0 | -1.0          | -1.1 | -1.1 | -1.1 | 1.1             | -1.0 | 1.0  | 1.0  | 1.2  | 10.8              |
| K | 1.1             | -1.2 | 1.3           | 1.2  | 1.1  | 1.4  | -1.0            | -1.1 | -1.0 | -1.1 | -1.0 | 5.1               |
| L | 1.0             | -2.2 | -1.2          | -1.2 | -1.1 | -1.2 | 1.0             | 1.1  | 1.1  | 1.0  | -1.0 | 14.1              |
| M | -1.5            | 3.6  | -1.0          | -1.1 | -1.0 | -1.1 | -1.0            | 1.1  | 1.1  | 1.1  | 1.0  | 2.6               |
| N | 1.3             | -2.5 | 1.1           | 1.1  | -1.1 | 1.1  | 1.0             | -1.0 | -1.0 | -1.1 | -1.0 | 4.8               |
| P | -1.2            | -1.4 | 1.0           | 1.1  | 1.0  | 1.1  | -1.0            | 1.0  | -1.0 | -1.0 | -1.0 | 3.3               |
| Q | -1.1            | -2.9 | 1.2           | -1.0 | 1.1  | 1.1  | 1.1             | 1.0  | -1.0 | -1.0 | -1.1 | 2.5               |
| R | -1.0            | 2.3  | 1.3           | 1.3  | 1.2  | 1.4  | -1.0            | -1.1 | -1.0 | -1.1 | -1.1 | 2.7               |
| S | -1.1            | 1.1  | -1.0          | 1.1  | 1.0  | 1.0  | 1.1             | -1.1 | -1.0 | -1.0 | -1.0 | 7.7               |
| T | -1.2            | -2.6 | -1.0          | 1.1  | 1.1  | 1.0  | 1.0             | -1.0 | -1.0 | 1.0  | -1.3 | 5.2               |
| V | -1.1            | 1.8  | -1.0          | 1.1  | 1.1  | 1.0  | -1.1            | 1.0  | -1.0 | -1.0 | -1.1 | 5.6               |
| W | -1.2            | 1.7  | -1.1          | -1.1 | -1.0 | -1.1 | 1.1             | 1.1  | 1.0  | 1.0  | -1.0 | 2.0               |
| Y | 1.3             | -1.0 | -1.0          | 1.0  | 1.0  | -1.1 | -1.1            | 1.0  | -1.0 | -1.0 | 1.3  | 4.5               |

X >1.5-fold increase relative to the median AA frequency  
 -X >1.5-fold decrease relative to the median AA frequency

Cmer: *Cyanidioschyzon merolae*; Gsul: *Galdieria sulphuraria*; Phai: *Pyropia haitanensis*; Ppur: *Porphyra purpurea*; Pumb: *Porphyra umbilicalis*; Pyez: *Pyropia yezoensis*; Ccri: *Chondrus crispus*; Gand: *Gracilariopsis andersonii*; Glem: *Gracilariopsis lemaneiformis*; Gory: *Gracilariophila oryzoides*; Ppul: *Plocamiocolax pulvinata*.







|                                              |                     |   |   |   |   |   |   |   |   |   |
|----------------------------------------------|---------------------|---|---|---|---|---|---|---|---|---|
| menB                                         |                     | + | + | - | - | - | - | - | - | - |
| menC                                         |                     | + | + | - | - | - | - | - | - | - |
| menD                                         |                     | + | + | - | - | - | - | - | - | - |
| menE                                         |                     | + | + | - | - | - | - | - | - | - |
| menF                                         |                     | + | + | - | - | - | - | - | - | - |
| moeB                                         |                     | + | + | + | + | + | + | + | + | + |
| pbsA                                         |                     | - | - | - | + | + | + | + | + | + |
| preA                                         | crtE                | + | + | + | + | + | + | + | + | + |
| sufB                                         | ycf24               | + | + | + | + | + | + | + | + | + |
| sufC                                         | ycf16               | + | + | + | + | + | + | + | + | + |
| thiG                                         |                     | + | + | + | + | + | + | + | + | + |
| thiS                                         | ycf40, orf71        | + | + | + | + | + | + | + | + | + |
| trxA                                         | trxM                | + | + | - | + | + | + | + | + | + |
| upp                                          | orf198              | - | - | - | + | + | + | + | + | + |
| <b>Plastid division</b>                      |                     |   |   |   |   |   |   |   |   |   |
| ftsH                                         | ycf25               | + | + | + | + | + | + | + | + | + |
| minD                                         |                     | - | - | ψ | - | - | - | - | - | - |
| minE                                         |                     | - | - | ψ | - | - | - | - | - | - |
| <b>Conserved hypothetical reading frames</b> |                     |   |   |   |   |   |   |   |   |   |
| ycf3                                         |                     | + | + | + | + | + | + | + | + | + |
| ycf4                                         |                     | + | + | + | + | + | + | + | + | + |
| ycf17                                        |                     | + | + | + | + | + | + | + | + | + |
| ycf19                                        |                     | + | + | + | + | + | + | + | + | + |
| ycf20                                        | apcL9.5, orf20      | + | + | + | + | + | + | + | + | + |
| ycf21                                        |                     | - | - | - | + | + | + | + | + | + |
| ycf22                                        |                     | - | + | - | + | + | + | + | + | + |
| ycf23                                        |                     | + | + | + | + | + | + | + | + | - |
| ycf27                                        | ompR, orf27         | + | + | + | + | + | + | + | + | + |
| ycf29                                        | luxR                | + | + | + | + | + | + | + | + | + |
| ycf33                                        |                     | - | + | - | + | + | + | + | + | + |
| ycf34                                        |                     | - | - | - | + | + | + | + | - | + |
| ycf35                                        |                     | - | - | - | + | + | + | + | - | + |
| ycf36                                        |                     | - | - | + | + | + | + | + | + | + |
| ycf37                                        |                     | + | - | + | + | + | + | + | + | + |
| ycf38                                        |                     | - | + | + | + | + | + | + | + | + |
| ycf39                                        |                     | + | + | + | + | + | + | + | + | + |
| ycf41                                        | orf109              | - | - | - | - | - | - | + | + | - |
| ycf45                                        | orf565              | + | - | + | + | + | + | + | + | + |
| ycf46                                        |                     | - | - | - | + | + | + | + | - | + |
| ycf49                                        |                     | + | + | + | - | - | - | - | - | - |
| ycf52                                        | orf174              | + | + | + | + | + | + | + | + | + |
| ycf53                                        | orf238              | + | + | ψ | + | + | + | + | + | + |
| ycf54                                        | orf108              | + | + | + | + | + | + | + | + | + |
| ycf55                                        |                     | + | + | - | + | + | + | + | + | + |
| ycf56                                        | orf263, rnZ         | - | - | + | + | + | + | + | + | + |
| ycf58                                        | cpcS, orf149        | + | - | + | + | + | + | + | + | + |
| ycf60                                        | orf203              | + | + | + | + | + | + | + | + | + |
| ycf63                                        | ycxr, ORF263        | - | + | - | + | + | + | + | + | + |
| ycf64                                        |                     | - | - | - | + | + | + | - | + | + |
| ycf65                                        |                     | + | + | - | + | + | + | + | + | + |
| ycf80                                        | matK, orf450        | + | + | + | + | + | + | + | + | + |
| ycf82                                        |                     | + | + | + | - | - | - | - | - | - |
| ycf83                                        | ycf57, orf114, sufA | - | + | + | + | + | + | - | - | - |
| ycf84                                        | yjgP.yjgQ           | + | + | + | - | - | - | - | - | - |
| ycf85                                        |                     | + | + | + | - | - | - | - | - | - |
| ycf86                                        | petP, orf68         | + | + | + | + | + | + | - | + | + |
| ycf91                                        |                     | - | - | - | + | + | + | + | + | + |
| ycf92                                        | orf245, ORF287      | - | - | - | + | + | + | + | + | + |
| <b>Other open reading frames</b>             |                     |   |   |   |   |   |   |   |   |   |
| orf58                                        |                     | - | - | - | + | + | + | + | + | + |
| orf621                                       |                     | - | - | - | + | + | + | + | + | + |

Table S3B - RNA genes in red algal plastid genomes

| Gene name             | Cyanidiophyceae |      |      | Bangiophyceae |      |      | Florideophyceae |      |      |      |
|-----------------------|-----------------|------|------|---------------|------|------|-----------------|------|------|------|
|                       | Ccal            | Cmer | Gsul | Phai          | Pyez | Ppur | Gten            | Ccri | Ctub | Gtai |
| <b>Ribosomal RNAs</b> |                 |      |      |               |      |      |                 |      |      |      |
| rrn5                  | +               | +    | +    | +             | +    | +    | +               | +    | +    | +    |
| rrn16                 | +               | +    | +    | +             | +    | +    | +               | +    | +    | +    |
| rrn23                 | +               | +    | +    | +             | +    | +    | +               | +    | +    | +    |
| <b>Transfer RNAs</b>  |                 |      |      |               |      |      |                 |      |      |      |
| trnA (GGC)            | -               | -    | +    | +             | +    | +    | -               | -    | -    | -    |
| trnA (TGC)            | +               | +    | +    | +             | +    | +    | +               | +    | +    | +    |
| trnC (GCA)            | +               | +    | +    | +             | +    | +    | +               | +    | +    | +    |
| trnD (GTC)            | +               | +    | +    | +             | +    | +    | +               | +    | +    | +    |
| trnE (TTC)            | +               | +    | +    | +             | +    | +    | +               | +    | +    | +    |
| trnF (GAA)            | +               | +    | +    | +             | +    | +    | +               | +    | +    | +    |
| trnG (GCC)            | +               | +    | +    | +             | +    | +    | +               | +    | +    | +    |
| trnG (TCC)            | +               | +    | +    | +             | +    | +    | +               | +    | +    | +    |
| trnH (GTG)            | +               | +    | +    | +             | +    | +    | +               | +    | +    | +    |
| trnI (GAT)            | +               | +    | +    | +             | +    | +    | +               | +    | +    | +    |
| trnK (TTT)            | +               | +    | +    | +             | +    | +    | +               | +    | +    | +    |
| trnL (CAA)            | +               | +    | +    | +             | +    | +    | +               | +    | +    | +    |
| trnL (CAG)            | -               | -    | +    | -             | -    | -    | -               | -    | -    | -    |
| trnL (GAG)            | +               | +    | +    | +             | +    | +    | -               | -    | -    | -    |
| trnL (TAA)            | +               | +    | +    | +             | +    | +    | +               | +    | +    | +    |
| trnL (TAG)            | +               | +    | +    | +             | +    | +    | +               | +    | +    | +    |
| trnM-CAT/trnI-CAT     | +               | +    | +    | +             | +    | +    | +               | +    | +    | +    |
| trnM(CAT)             | +               | +    | +    | +             | +    | +    | +               | +    | +    | +    |
| trnMe (CAT)           | -               | -    | -    | +             | +    | +    | +               | +    | +    | +    |
| trnN (GTT)            | +               | +    | +    | +             | +    | +    | +               | +    | +    | +    |
| trnP (TGG)            | +               | +    | +    | +             | +    | +    | +               | +    | +    | +    |
| trnQ (TTG)            | +               | +    | +    | +             | +    | +    | +               | +    | +    | +    |
| trnR (ACG)            | +               | +    | +    | +             | +    | +    | +               | +    | +    | +    |
| trnR (CCG)            | +               | -    | +    | +             | +    | +    | +               | +    | +    | +    |
| trnR (CCT)            | -               | -    | +    | +             | +    | +    | -               | -    | -    | -    |
| trnR (TCT)            | -               | +    | +    | +             | +    | +    | +               | +    | +    | +    |
| trnS (CGA)            | -               | -    | +    | +             | +    | +    | -               | -    | -    | -    |
| trnS (GCT)            | +               | +    | +    | +             | +    | +    | +               | +    | +    | +    |
| trnS (GGA)            | -               | +    | +    | +             | +    | +    | -               | -    | +    | -    |
| trnS (TGA)            | +               | +    | +    | +             | +    | +    | +               | +    | +    | +    |
| trnT (CGT)            | -               | -    | +    | -             | -    | -    | -               | -    | -    | -    |
| trnT (GGT)            | +               | +    | +    | +             | +    | +    | +               | +    | +    | +    |
| trnT (TGT)            | +               | +    | +    | +             | +    | +    | +               | +    | +    | +    |
| trnV (GAC)            | +               | +    | +    | +             | +    | +    | +               | +    | +    | +    |
| trnV (TAC)            | +               | +    | +    | +             | +    | +    | +               | +    | +    | +    |
| trnW (CCA)            | +               | +    | +    | +             | +    | +    | +               | +    | +    | +    |
| trnY (GTA)            | +               | +    | +    | +             | +    | +    | +               | +    | +    | +    |
| <b>Other RNAs</b>     |                 |      |      |               |      |      |                 |      |      |      |
| ffs                   | +               | +    | -    | +             | +    | +    | +               | +    | +    | +    |
| rnpB                  | +               | +    | +    | +             | +    | +    | +               | +    | +    | +    |
| ssrA                  | -               | +    | +    | +             | +    | +    | +               | +    | +    | +    |

Ccal: *Cyanidium caldarium*; Cmer: *Cyanidioschyzon merolae*; Gsul: *Galdieria sulphuraria*; Phai: *Pyropia haitanensis*; Pyez: *Pyropia yezoensis*; Ppur: *Porphyra purpurea*; Gten: *Gracilaria tenuistipitata*; Ccri: *Chondrus crispus*; Ctub: *Calliarthron tuberculosum*; Gtai: *Grateloupia taiwanensis*

Figure S1A - *atp4* gene. A) Gene order map showing the genomic position of the putative *G. andersonii* *atp4* gene newly identified in this study (shaded in gray). B) Amino acid alignment of *atp4*. Positions with amino acids identical or similar in >75% of sequences are shaded black or gray, respectively. Corrected frameshift mutations are highlighted in yellow and marked with an "X." C) Nucleotide alignments of the frameshift mutations located in mononucleotide repeat regions. Gaps inserted to correct the reading frame are highlighted in yellow.

**A**

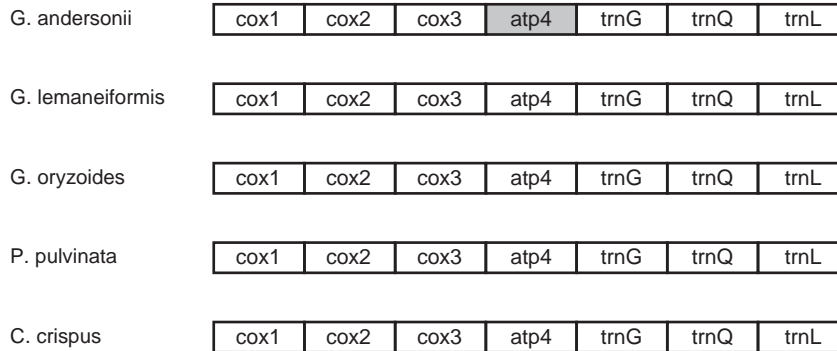

**B**

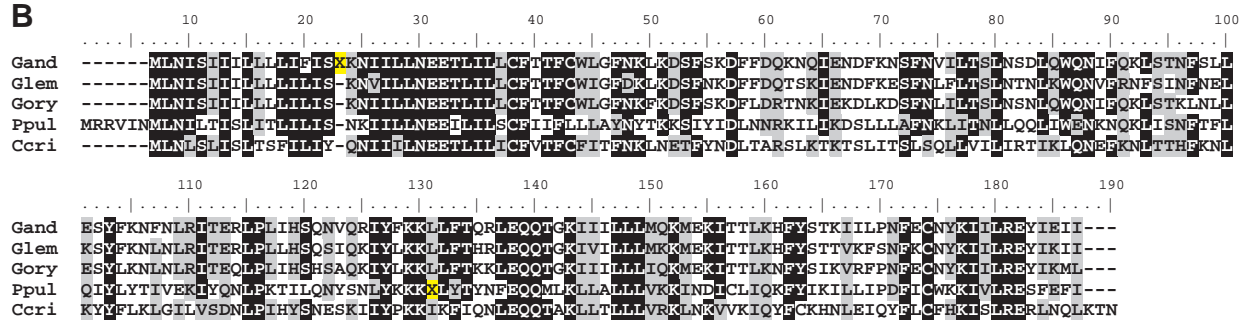

**C**

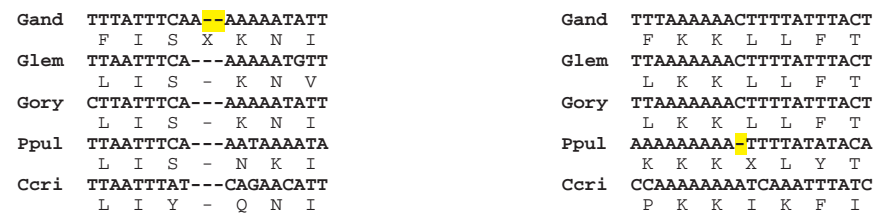



Figure S1B - *atp8* gene. A) Gene order map showing the genomic position of the putative *atp8* genes newly identified in this study (shaded in gray). The status of *rpl5* is shown in Supplementary Figure S1E, while the status of *trnI-gau* is shown in Supplementary Figure S1H. B) Amino acid alignment of *atp8*. Positions with amino acids identical or similar in >75% of sequences are shaded black or gray, respectively. A corrected frameshift mutation is highlighted in yellow and marked with an "X." C) Nucleotide alignment of the frameshift mutation located in a mononucleotide repeat region. The gap inserted to correct the reading frame is highlighted in yellow.

**A**

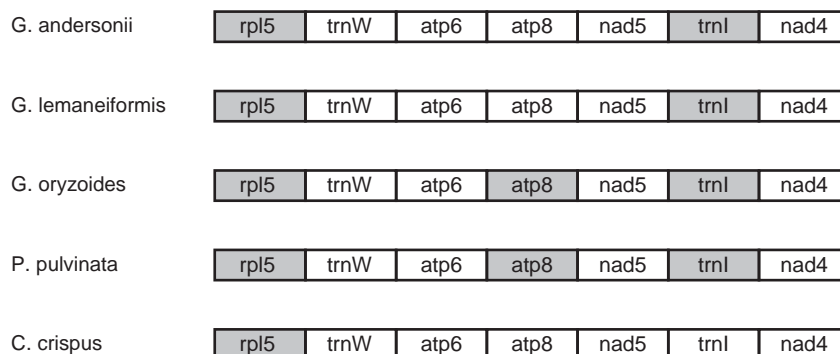

**B**

```

      10      20      30      40      50      60      70      80      90      100
Gand  MPQLDRIVFSQIFWLFIFLFLVTLTHFFLPKFIKSKIRKQILDENSTIEISSLAENTLQKONLLKKILLKDLKESVKLLLIQ-HFSNIVKEKSHANTTS
Glem  MPQLDRIVFSQIFWLFIFLFAFYVTLTHFFLPKFIKSKIRKQIIDANSTIEILLMAKNLLKONLLKKFLLKDLKELIKNLLIQ-YENNVKEKSYANTTS
Gory  MPQLDRIVFSQIFWLFIFLFLVTLTHFFLPKFIKSKIRKQIIDTNSIEISSLAENTLHKHNLLNFFLKKDLKESVKALLAQ-HFSNIVKEKNYANTTS
Ppul  MPQLDRIIVFSQIFWLFIFLFLVTLTHFFLPVFLKSKIRKELINSLNLEVSKLEELISFKKRTLLYSNVNQQLLIKKLLKKNELIFLKKKE---NSI
Ccri  MPQLDRIVFSQIFWLFIFLFLVTLTHFFLPKFIKSKIRKQILEANDTELSELTSKIINKQLLLKQLLLKLVMMVNISLGH-EFS-ISNTLPKLDIH

      110      120      130
Gand  LIDDKISFVIFNTVTYCDLQLLNATIVYPRVLRKYK---
Glem  LVDEKISSVILNLTMYCDLQLLNATIVVYPRVLRKIN---
Gory  LIDDKIGFVILNLTLYCDLQLLNATIVYPRVLEYK---
Ppul  IHDKKISFISNTTKEYNLQINSLIPFSSKILNLLNK--
Ccri  KIDTKISVTRNVSLYCDVQLFNCFYFPKLLNITFKPV

```

**C**

```

Gand  AATTTGTTAAAGAAAATATTG
      N L L K K I L
Glem  AATTTATTAATAAATTTTAA
      N L L K K F L
Gory  AACTTGTTAAA-FTTTTTTAA
      N L L X F F L
Ppul  ACTTTATATATAGTAATGTG
      T L L Y S N V
Ccri  CTTTGTAAACAACTTTGT
      L L L K Q L L

```

Figure S1C - *sdhC* gene. A) Gene order map showing the genomic position of the putative *G. oryzoides* *sdhC* gene newly identified in this study (shaded in gray). The status of *trnA-ggc* (shaded in blue) is shown in Supplementary Figure S1G. B) Amino acid alignment of *sdhC*. Positions with amino acids identical or similar in >75% of sequences are shaded black or gray, respectively. A corrected frameshift mutation is highlighted in yellow and marked with an "X." C) Nucleotide alignment of the frameshift mutation located in a mononucleotide repeat region. The gap inserted to correct the reading the frame is highlighted in yellow.

**A**

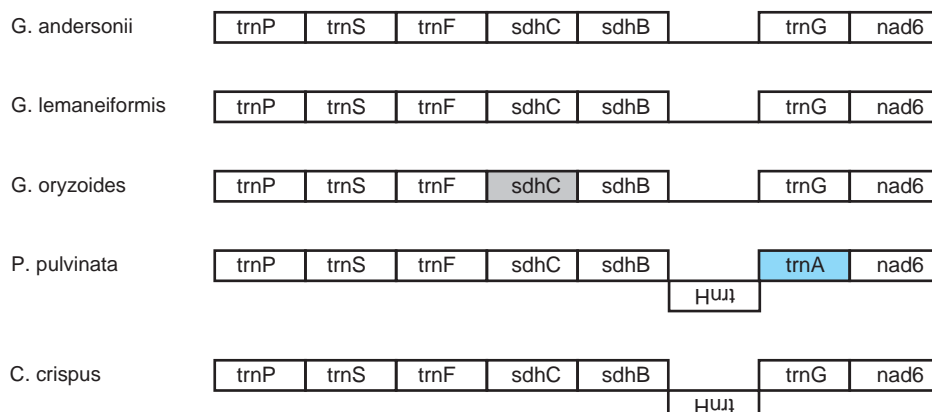

**B**

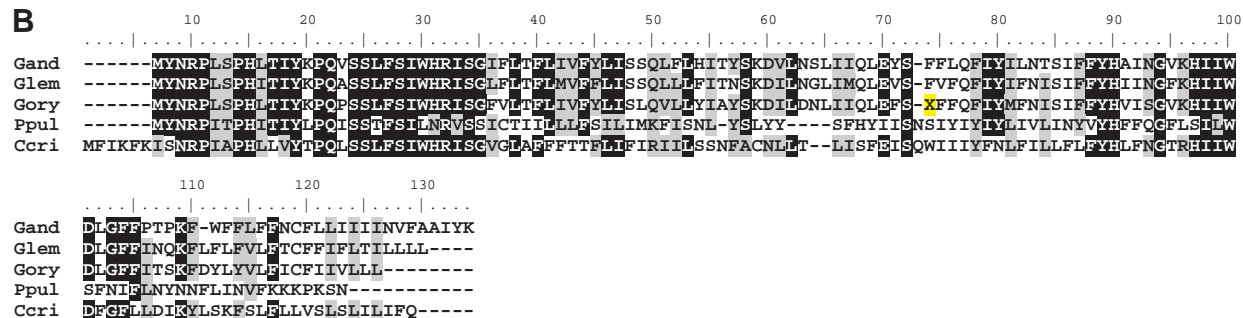

**C**

Gand TATTCT---TTCTTTTACAA  
 Y S - F F L Q  
 Glem GTTTCT---TTTGTTTTCAA  
 V S - F V F Q  
 Gory TTTTCT---TT-**X**TTTTCAA  
 F S - X F F Q  
 Ppul ATATCTAATTCAATATATATA  
 I S N S I Y I  
 Ccri ATTTCCCAATGAATAATTATT  
 I S Q W I I I

Figure S1D - *rpl20* gene. A) Gene order map showing the genomic position of all *rpl20* genes newly identified in this study (shaded in gray). A loss of synteny upstream of *rpl20* in *G. oryzoides* and *C. crispus* is marked with a “//.” B) Amino acid alignment of *rpl20*. Positions with amino acids identical or similar in >75% of sequences are shaded black or gray, respectively.

**A**

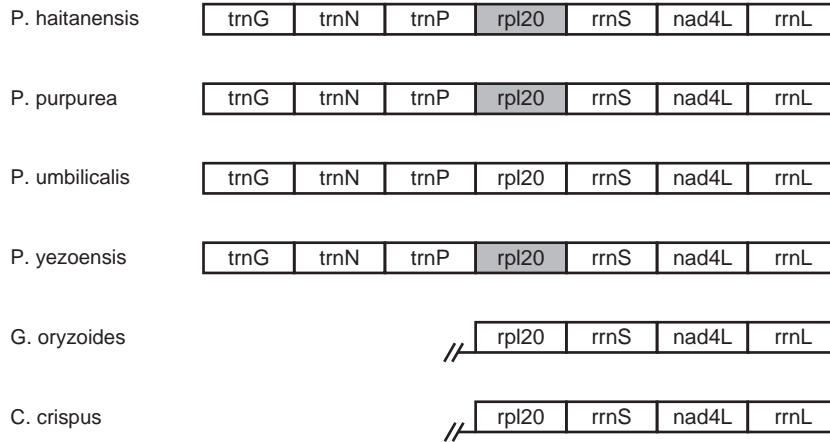

**B**

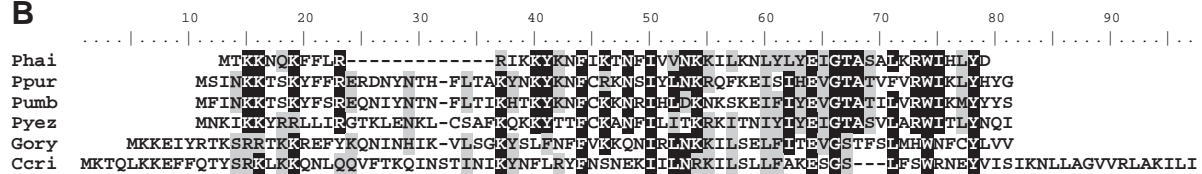

Figure S1E - *rpl5* gene. A) Gene order map showing the genomic position of all putative *rpl5* genes newly identified in this study (shaded in gray). The status of *atp8* is shown in Supplementary Figure S1B. B) Amino acid alignment of *rpl5*. Positions with amino acids identical or similar in >75% of sequences are shaded black or gray, respectively. A corrected frameshift mutation is highlighted in yellow and marked with an "X." C) Nucleotide alignment of the frameshift mutation located in the mononucleotide repeat region. Gaps inserted to correct the reading frame are highlighted in yellow.

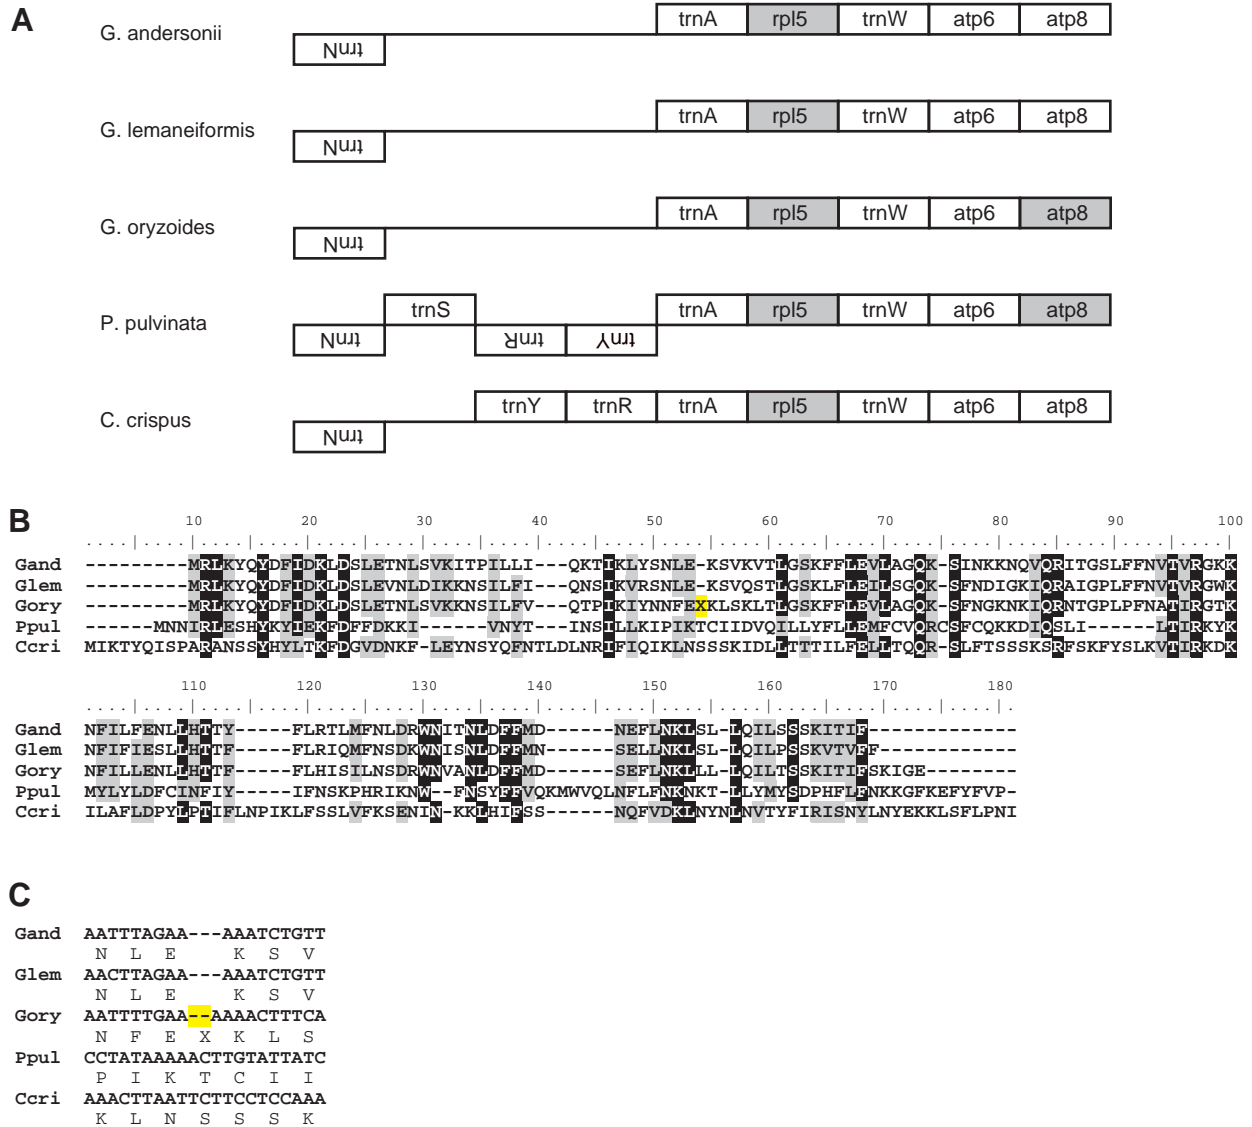

Figure S1F - *rrn5* gene. A) Gene order map showing the genomic position of all *rrn5* genes newly identified in this study (shaded in gray). In parallel, the *rrn5* was also recently identified in the species shown below, as well as all sequenced Bangiales species (Valach et al. 2014). B) Nucleotide alignment of *rrn5*. Positions with nucleotides identical in >75% of sequences are shaded black.

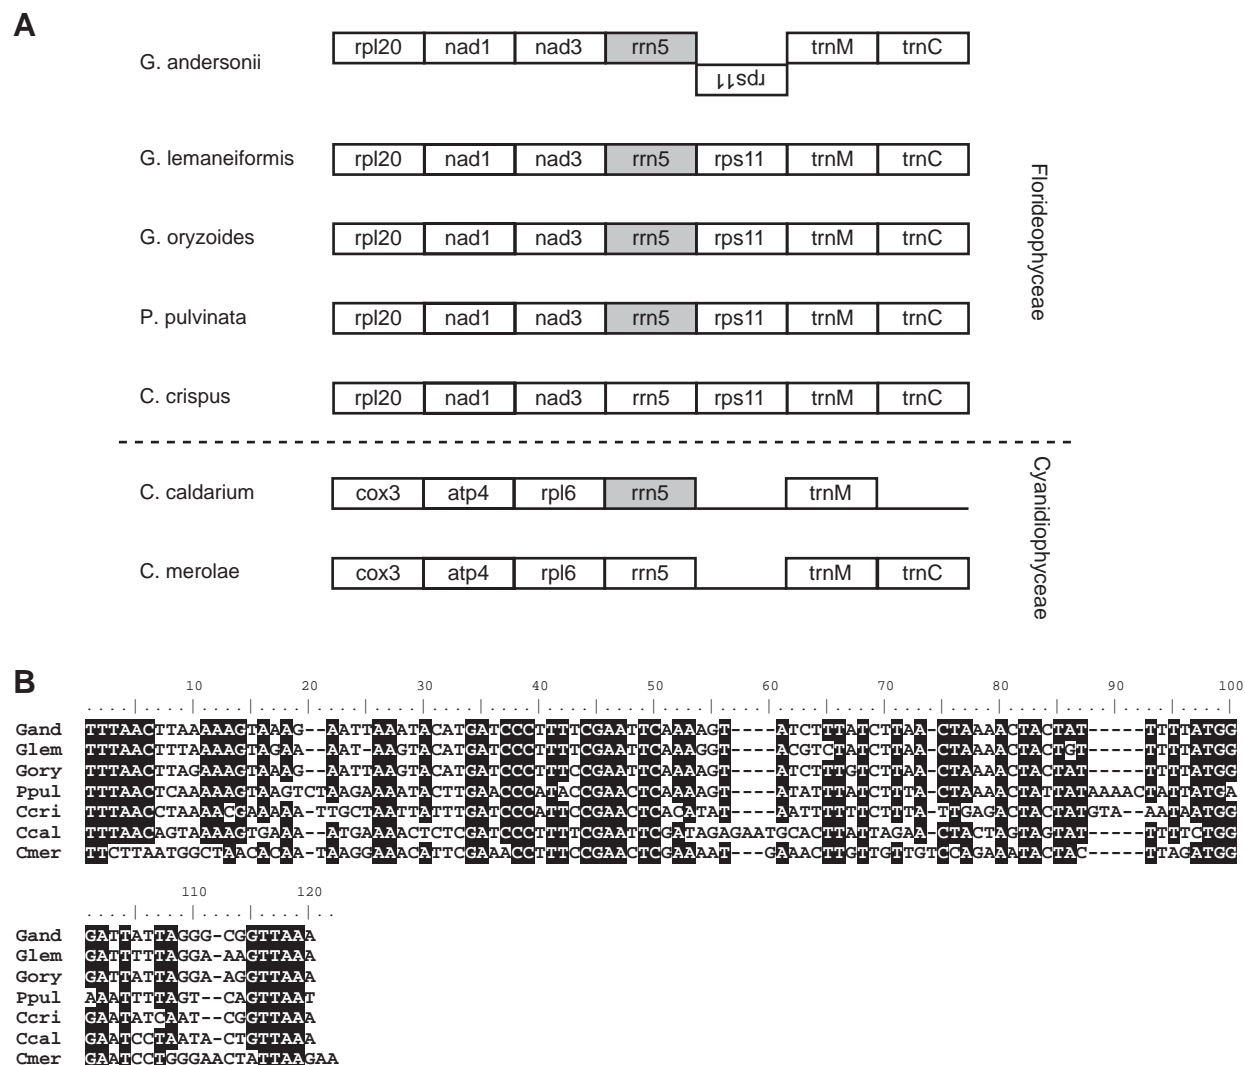

Figure S1G - *trnA-ggc* gene. A) Gene order map showing the genomic position of the *P. pulvinata* *trnA-ggc* gene (highlighted in blue) and the *trnG-gcc* gene in other Florideophyceae species. The status of *sdhC* is shown in Supplementary Figure S1C. B) Nucleotide alignment of *trnA-ggc* and *trnG-gcc*. Positions with nucleotides identical in >75% of sequences are shaded black. The anticodon mutation is highlighted in blue.

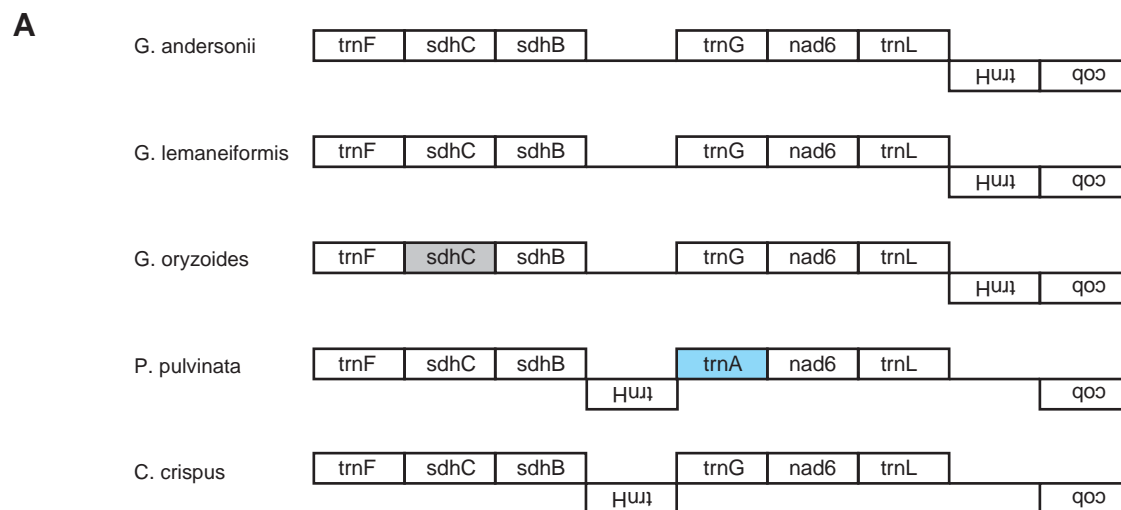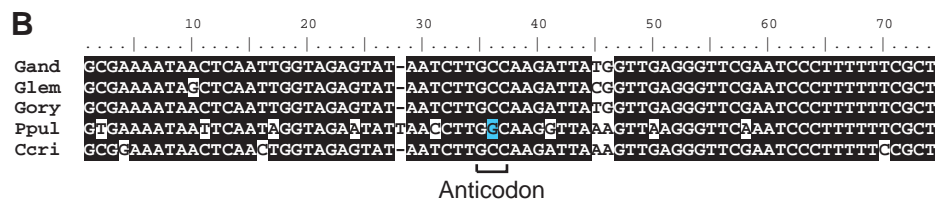

Figure S1H - *trnI*-*gau* gene and intron. A) Gene order map showing the genomic position of all *trnI*-*gau* genes newly identified in this study (shaded in gray). The status of *atp8* in *G. oryzoides* and *P. pulvinata* is shown in Supplementary Figure S1B. B) Nucleotide alignment of *trnI*-*gau* with exon and intron positions highlighted in yellow and brown, respectively. Positions with nucleotides identical in >75% of sequences are shaded black.

**A**

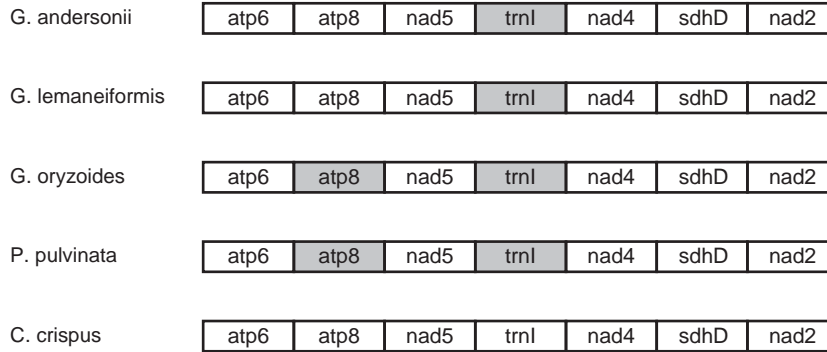

**B**

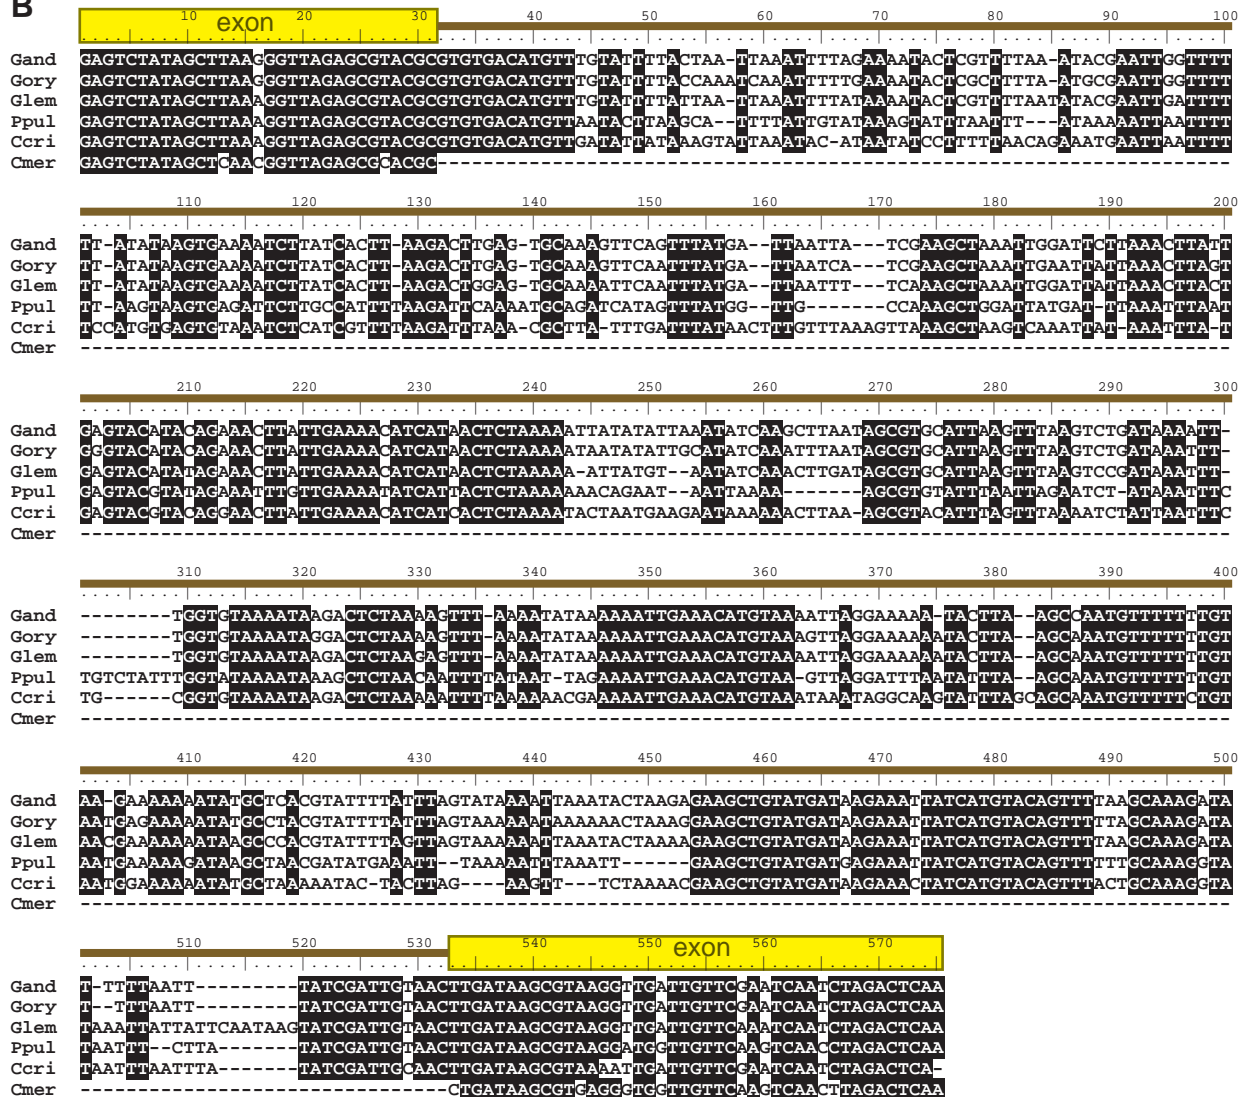

Figure S11 - *cox1* intron. A) *cox1* intron position based on old annotations present in GenBank files (shown in green for *P. pulvinata* and in yellow for *P. haitanensis* and *P. yezoensis*) and new annotations reported here (in purple). The new annotations improve exon similarity compared with intron-lacking species and restore canonical GTGYG-AC intron boundary sequences for all three intron-containing species. B) Sequence alignment of the *cox1* intron from *P. pulvinata* compared to *P. haitanensis* and *P. yezoensis*. The large internal segment of the *P. haitanensis* and *P. yezoensis* introns (encoding the majority of the IEP) is absent from *P. pulvinata* and was excluded from the alignment.

**A**

```

Ccri      GCGCATTTCATTATG----- no intron -----TACTTTC AATGGGAGCTGTTTTT
Gand     GCCCATTTCATTATG----- no intron -----TTTTATCTATGGGTGCCGTTTTT
Ppul-old  GCCCATTTCATTACGGTGCCTTGTCTAATACAATTtaacaaagtt- (531 bp) -tcctacttcacttattatctATGGGAGCAGTTTTT
Ppul-new  GCCCATTTCATTACGGTgcgcttgctctaatacaatttaacaaagtt- (531 bp) -tcctacttcacTATTATCTATGGGAGCAGTTTTT

Phai-old  GCTCACTTTCATTATGgtgcgccgtcctaattgcgctttatcgctcgct- (2320 bp) -tcctactctacTTTTATCTATGGGTGCAGTTTTT
Phai-new  GCTCACTTTCATTATGgtgcgccgtcctaattgcgctttatcgctcgct- (2320 bp) -tcctactctacTTTTATCTATGGGTGCAGTTTTT
Pyez-old  GCTCACTTCCACTATgtgcgccgtcctaattgcgctttatcgctcgct- (2320 bp) -tcctactctacCTTCTGTCTATGGGAGCTGTTTTT
Pyez-new  GCTCACTTCCACTATGgtgcgccgtcctaattgcgctttatcgctcgct- (2320 bp) -tcctactctacTTCTGTCTATGGGAGCTGTTTTT
Ppur     GCACATTTCATTACG----- no intron -----TGCTATCGATGGGGCAGTTTTT
Pumb     GCACATTTCATTATG----- no intron -----TACTTTC AATGGGAGCAGTTTTT
  
```

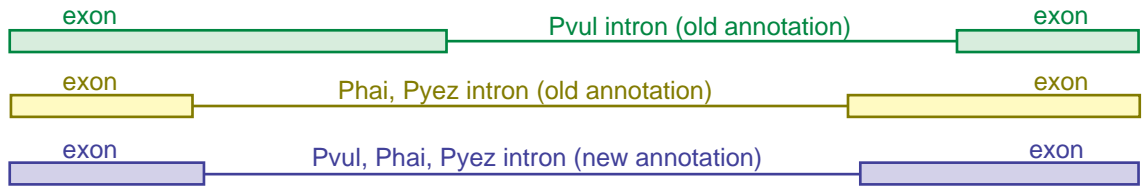

**B**

```

      10      20      30      40      50      60      70      80      90     100
Ppul  GTGCGTTTCTCTAATACAAATTTACAAAGTTCAT-----AAAATG-----AATATATAA---AAAGCTTTTATAAATTTATATATAATAAAC
Phai  GTGCGCCCTCTAATTCGCTTTTACGTCGCTTACTTCAGTCAGCATGTATTACCATTCTTGAATATATAAATAAAGTTTATAAATTATACATTAAC
Pyez  GTGCGCCCTCTAATTCGCTTTTACGTCGCTTACTTCAGTCAGCATGTATTACCATTCTTGAATATATAAATAAAGTTTATAAATTATACATTAAC

      110     120     130     140     150     160     170     180     190     200
Ppul  TAGCAACTTAC---TATTTATGATAATTTAAATAAATAGAACCAAAGCATGTTGTAAAAAAG-----ATAGCTAA---GTTGTT-----CAAGGTT
Phai  AATCAACTTACTTATTTCTGGCCA---ACAGAAAAGCAGCATATAGCATGTTGATAAAGGAGTTTGGAAATAGTAAACTCCGACTTATATTACCATGCTT
Pyez  AATCAACTTACTTATTTCTGGCCA---ACAGAAAAGCAGCATATAGCATGTTGATAAAGGAGTTTGGAAATAGTAAACTCCGACTTATATTACCATGCTT

      210     220     230     240     250     260     270     280     290     300
Ppul  AGGTTAAC---AAATCCTTTTATTAATCAG-----TTTAA---TCTAATCAAAAAAATAATGATTAGTATCTTAA---TAAAAATTATACGTAA-A
Phai  AGGCTAACGAACTCCTTTTAA---CAATCAGCCAGGCGGATATCAAGTTCAGATC-ATTACAAATAATGA--AGTATTGCACGGTGAAAACCTTACGTAGTT
Pyez  AGGCTAACGAACTCCTTTTAA---CAATCAGCCAGGCGGATATCAAGTTCAGATC-ATTACAAATAATGA--AGTATCTCAGGTCAAAATTTTACATAGTT

      310     320     330     340     350     360     370     380     390     400
Ppul  AAATTTTATTCGAAAGCTTTAAGAATAAAAAATTATATTTAATTTTTAA---CTGTAGGA---AACCTAAAAATAATTAATATGTTAAATTGTAGAATTC
Phai  AGGCCTTTACAGCAAGGCTAATAACCAAAATTTAAGTAAAAATTTTTAAAGCTG-AGGAGAACCTAAAAGGTACTTATTAATGTTAAGCGTAAGAATTCG
Pyez  AGACCTTTTACAGCAAGGCTCTGGTAACCAAAATTTAAGTAAAAATTTTTAAAGCTG-AGGAGAACCTAAAAGGTACTTATTAATGTTAAGCGTAAGAATTCG

      2230    2240    2250    2260    2270    2280    2290    2300    2310
Ppul  AGAAA- (99 bp) ---AATTTACTTA-----TATTTA-----TTTTTAAAGCGAAAGCCGTCTGCGGTGAAAAT
Phai  GGAAA- (1823 bp) ---AACTTATTCACAAGGGTAAGTATGATGGTTCAAAAATATTTAAGTGACTCTTTTGAAGTGAAAGCCAATATCGCGGTGAAAAG
Pyez  GGAAA- (1823 bp) ---AACTTATTCACAAGGGTAAGTATGATGGTTCAAAAATATTTAAGTGACTCTTTTGAAGTGAAAGCCAATATCGCGGTGAAAAG

      2320    2330    2340    2350    2360    2370
Ppul  CGCAAGCAAGGTTTGGGAAAGAGGATTAACTATATAATTTAATAAATTTA---TTTCTACTCTAC
Phai  CGCAAGTATGGTTTGGGAAAGAGGATTTTG-----ATACTTAAAAAGATTGGTCTCTACTCTAC
Pyez  CGCAAGTATGGTTTGGGAAAGAGGATTTTG-----ATACTTAAAAAGATTAGTCTCTACTCTAC
  
```



Figure S2 - Predicted stem-loop structures in the *Galdieria sulphuraria* plastid genome. Structures were predicted with the EMBOSS program einverted (<http://emboss.bioinformatics.nl/cgi-bin/emboss/einverted>), requiring a  $\geq 20$  bp stem with  $\geq 80\%$  sequence identity and a  $\leq 20$  bp loop.

```
Galdieria-CP: Score 78: 26/26 (100%) matches, 0 gaps
 3547 aaaaaaataatcttgcctatagctat 3572
      |||
 3602 ttttttatagaacgagatatcgata 3577

Galdieria-CP: Score 134: 46/47 ( 97%) matches, 0 gaps
 5036 aataaaaatgatggaagttcgttaataaaccatctattacaaggta 5082
      |||
 5136 ttatttttataccttcaagtatttattattggtagataatggtccat 5090

Galdieria-CP: Score 75: 25/25 (100%) matches, 0 gaps
 7649 tacataaaaaatataatggtatctt 7673
      |||
 7699 atgtattttttatataccatagaa 7675

Galdieria-CP: Score 134: 46/47 ( 97%) matches, 0 gaps
 11104 aggtaagattgattagaaaataaaaataatctagtgtatcttattt 11150
      |||
 11205 tccatttctaactaatcttttgtttttatttagatcacatagaataaa 11159

Galdieria-CP: Score 138: 46/46 (100%) matches, 0 gaps
 19510 aattgtattaaagatagatcagatagaaaataaaaggccatttata 19555
      |||
 19602 ttaacataatttctatctagtctatctttattttccggtaaaatat 19557

Galdieria-CP: Score 63: 21/21 (100%) matches, 0 gaps
 27947 aagattaaaaaagtgatagt 27967
      |||
 27992 ttctaattttttcacctatca 27972

Galdieria-CP: Score 147: 49/49 (100%) matches, 0 gaps
 31116 aaactttaaaaagggaataaaaaatagataaaaattggattggttctttg 31164
      |||
 31218 ttgaaatttttccctttatttttatctatttttaacctaaccaagaaac 31170

Galdieria-CP: Score 150: 50/50 (100%) matches, 0 gaps
 48093 aaggaagcattaaaaaacctcaataaatagaaaagatattatactctaa 48142
      |||
 48193 ttccctcgtaatttttggagttatttatcttttctataaatagagatt 48144

Galdieria-CP: Score 62: 30/31 ( 96%) matches, 2 gaps
 49807 aataata-ttat-ttgatattttgataatagaa 49837
      || ||| ||| |||
 49880 ttggtatcaatataactataaaaactattatctt 49848

Galdieria-CP: Score 59: 21/22 ( 95%) matches, 0 gaps
 53158 taataataataataaaaaact 53179
      ||| |||
 53207 attggttattatttttttga 53186

Galdieria-CP: Score 114: 38/38 (100%) matches, 0 gaps
 57756 taaattatataagaataaaaaagaaaataaagtaaatca 57793
      |||
 57834 atttaatatatcttatttttcttttatttcatttagt 57797

Galdieria-CP: Score 135: 44/44 (100%) matches, 0 gaps
 58808 aatattgaaaaatttcacaaaaatgagctaagcaaaatgattt 58851
      |||
 58897 ttataactttttaaagtgttttactcgatttcgtttactaaa 58854
```

Galdieria-CP: Score 78: 26/26 (100%) matches, 0 gaps  
59197 aatattatataaattttttattctta 59222  
|||||  
59253 ttataatataatttaaaaataaagaat 59228

Galdieria-CP: Score 66: 22/22 (100%) matches, 0 gaps  
59483 aatataagaatgagtacaaaa 59504  
|||||  
59531 ttatatttcttactcatgtttt 59510

Galdieria-CP: Score 93: 30/30 (100%) matches, 0 gaps  
60641 ttaattaatacaatcaataaacaaaaatgt 60670  
|||||  
60702 aattaattatgtagttatttgtttttaca 60673

Galdieria-CP: Score 68: 31/32 ( 96%) matches, 2 gaps  
61424 tattaagtataaattataataacaaattatta 61457  
|||| |  
61491 ataaattca-ta-ttaattatttgtttaataat 61460

Galdieria-CP: Score 113: 39/40 ( 97%) matches, 0 gaps  
66325 caagcaattaaatatttagtaaaaaacacacataacca 66364  
|||||  
66407 gttcgttaattataaatcatttttatttgtgtattggt 66368

Galdieria-CP: Score 288: 96/96 (100%) matches, 0 gaps  
70875 ttataagaacagaaaattattatcagtatagtaggagaataatcaaaaattctccttgtaaaaaagggtatgtctgaataattactatagttaat 70970  
|||||  
71072 aatattctgtcttttaataatagtcataatcctcttattattagttttaagggaacattttccacacagacttattaatgatatcaatta 70977

Galdieria-CP: Score 99: 33/33 (100%) matches, 0 gaps  
89622 ataatcaataggatataaacgcttaactttt 89654  
|||||  
89692 tatttagttatcctatattttgcaattgaaaa 89660

Galdieria-CP: Score 146: 50/51 ( 98%) matches, 0 gaps  
92864 taactaatgaataaataaaaataaaaagaagaataaaaatctttgtaag 92914  
|||||  
92971 attgatcacttattattttttaaattttcttcttttttagaaacattc 92921

Galdieria-CP: Score 132: 43/43 (100%) matches, 0 gaps  
96179 aaattaatgtgattgatgttataaatgattatattatctta 96221  
|||||  
96266 ttttaatacactaacataatatttactaataataatagaat 96224

Galdieria-CP: Score 147: 48/48 (100%) matches, 0 gaps  
97529 agaaatccgaatcgtagagacttagaataaaaatgaaaagccctagttt 97576  
|||||  
97626 tctttaggcttagcatctctgaatcttattttacttttcgggatcaaa 97579

Galdieria-CP: Score 129: 43/43 (100%) matches, 0 gaps  
99714 taagatatttatctcataaaatattgatattgatgttataata 99756  
|||||  
99802 attctataaatagagtattttataactataactacaatattat 99760

Galdieria-CP: Score 232: 79/81 ( 97%) matches, 0 gaps  
101673 tttcatttattagtaggtttgtttttattttatgttgaaacaagaagaattgggtaatagaagaagacaatctgagtta 101753  
|||||  
101836 aaaggtaataatcataccgaaacaaaaataaatacaactgttcttctttaaccaattacttcttctgtcagactcaat 101756

Galdieria-CP: Score 111: 37/37 (100%) matches, 0 gaps  
102484 tctataataacataataagaaaatgataataagggt 102520  
|||||  
102560 agatattattgtattattcttttactattattcccga 102524

Galdieria-CP: Score 161: 55/56 ( 98%) matches, 0 gaps  
107228 tttatattttccattataataacttcttaactataaacaataaggacttaacttt 107283  
|||||  
107343 aaataaaaaaggttaataatgatgaagaattgatattcgtttattcctgaatttgaaa 107288

Galdieria-CP: Score 179: 60/61 ( 98%) matches, 0 gaps  
108167 atatcataataaatccttcaaaaattttatattaaaaaatctatagaaaaagttataataat 108227  
||  
108290 tacagtattatttaggaagttttaaataataatttttagatatcttttcaatattatta 108230

Galdieria-CP: Score 69: 23/23 (100%) matches, 0 gaps  
115296 acaaaaaatagttctatttata 115318  
|||||  
115346 ttgtttttatacaagataaatat 115324

Galdieria-CP: Score 150: 49/49 (100%) matches, 0 gaps  
122947 aagtttaattacaaaaagaaaattaattttgtatattattctagttta 122995  
|||||  
123046 ttcaatttaagttttcttttaattataaacatataataagatcaaaat 122998

Galdieria-CP: Score 141: 47/47 (100%) matches, 0 gaps  
137298 catgaaaagaagaaaaacaagaaaaataagtaattgataacctta 137344  
|||||  
137393 gtaccttttcttcttttctttttattcattaactattggaat 137347

Galdieria-CP: Score 110: 38/39 ( 97%) matches, 0 gaps  
140523 taagtaaattagttggaataattatgtagaaactacta 140561  
|||||  
140602 attcatttaataccaacttattaatacatctttgatcat 140564

Galdieria-CP: Score 153: 51/51 (100%) matches, 0 gaps  
143415 attaatcataaaaaagatgagagaataacaaataattattagatataat 143465  
|||||  
143524 taattagattttttctactcttattgtttatttaataatctatatta 143474

Galdieria-CP: Score 103: 36/38 ( 94%) matches, 0 gaps  
149605 tataaaataagaaaaatataaaaaacaatattattata 149642  
|||||  
149682 atattttattctttttatattttttgttataataataat 149645

Galdieria-CP: Score 81: 27/27 (100%) matches, 0 gaps  
149955 aagatgaaaaaagaaatgaggataaat 149981  
|||||  
150010 ttctactttttctttactcctattta 149984

Galdieria-CP: Score 138: 50/50 (100%) matches, 1 gaps  
151873 tatgaataacaaataaagagatagattgatagattaagttaacaatcggtta 151923  
|||||  
151975 atacttattgtttatttctctatctaactatctaattc-attgtagccat 151926

Galdieria-CP: Score 156: 51/51 (100%) matches, 0 gaps  
154254 tttttatttagatgcctttaagttgggaagctaaaaaagaacaaagtaaa 154304  
|||||  
154357 aaaaataaatctacggaaattcaacccttcgattttttcttgtttcattt 154307

Figure S3 - Dot plot analyses of the plastid genomes of *G. sulphuraria* (top), *P. yezoensis* (middle), and *C. merolae* (bottom). Direct repeats are shown in red. Inverted repeats are shown in blue. Genome sizes are shown in kb.

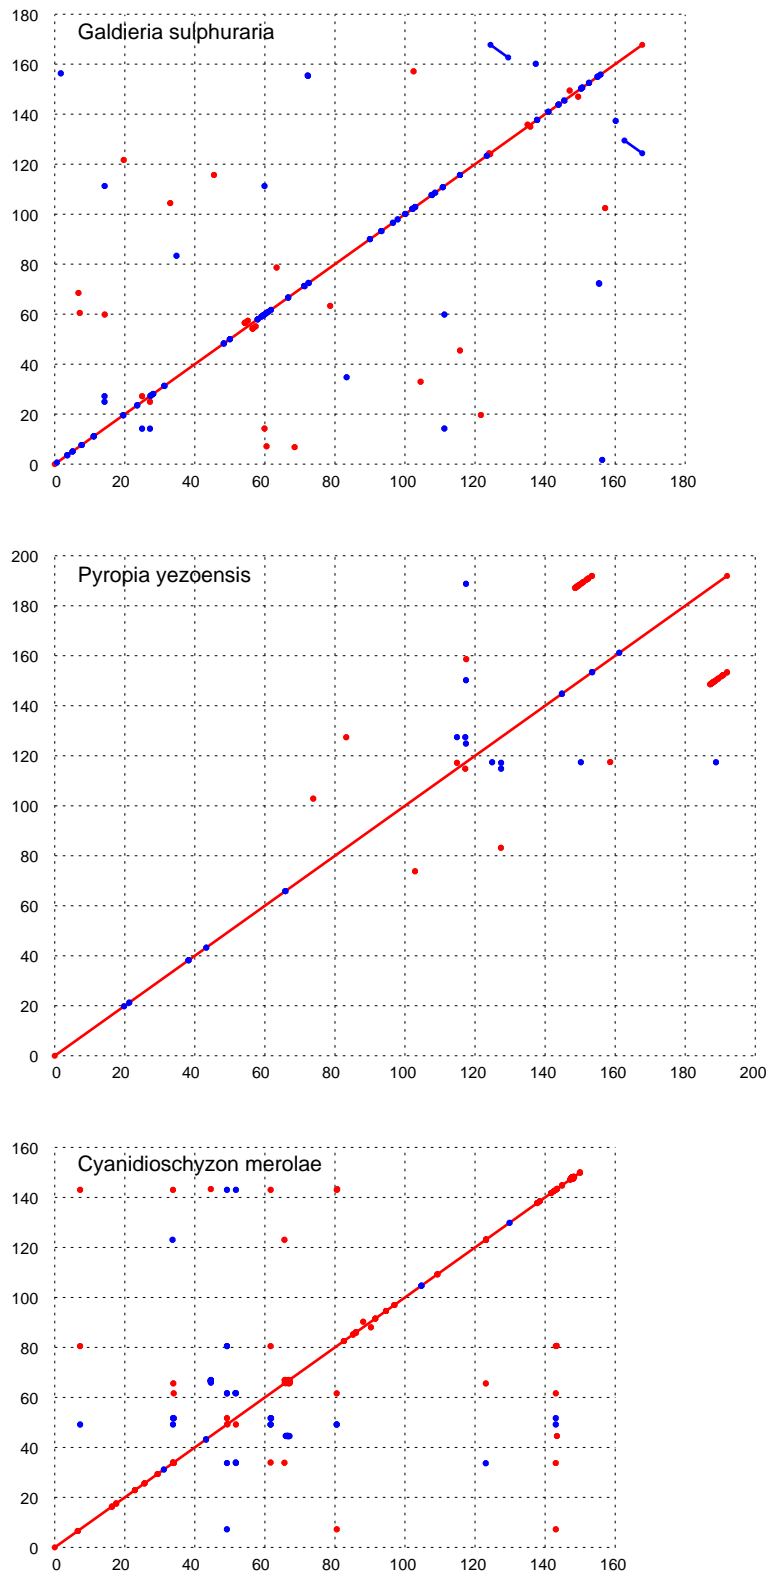

Supplement: supp_evu290_SuppFiles-GBE-v4.pdf [file supp_evu290_SuppFiles-GBE-v4.pdf]
